# Supplementary material for: Psoas muscle mass index and peak expiratory flow as measures of sarcopenia: relation to outcomes of elderly patients with resectable esophageal cancer
Source: Front Oncol. 2023 Nov 28;13:1303877. doi: 10.3389/fonc.2023.1303877 (PMC10715412; doi:10.3389/fonc.2023.1303877)
Supplement: Supplementary file 1 [file DataSheet_1.xlsx]

## Sheet: Sheet1
ID	Sarcopenia	PEF	PEF.cut	PMI	PMI.cut	Gender	Age	Age.cut	HP	DM	BMI	BMI.cut	Smoking	Location	T.stage	T.stage.cut	N.stage	N.stage.cut	FEV1	FEV1.cut	PNI	Alb	pre.Alb	pre.Alb.cut	Operation.time	Operation.time.cut	Pneumonia	Anastomotic.leakage	Pleural.effusion	Arrhythmia	Dead.within.30.days	LOS	Date.of.operation	OS.day	OS.month	Deadline	Status
2020000454	0	4.94	0	7.79504	0	0	88	1	1	0	1	1	0	1	3	1	0	0	97	0	48.4	39.4	161.2	0	5	1	0	0	0	0	0	27	2020-01-02	343	11.4333	2020-12-10	1
2020000941	0	4.61	0	6.23208	1	0	74	1	0	0	0	0	0	1	3	1	1	1	72	1	53.65	43.7	215.3	0	4	1	1	0	0	1	0	15	2020-01-03	1053	35.1	2022-11-21	1
2020000965	1	3.09	1	3.31556	1	1	74	1	0	0	0	0	0	1	3	1	0	0	87	0	54.15	44.8	173	0	2.67	0	0	0	0	0	0	15	2020-01-03	1305	43.5	2023-07-31	0
2020001931	1	2.25	1	3.42215	1	0	86	1	0	0	0	0	0	2	3	1	0	0	49	1	48.45	41.9	123.8	1	4.5	1	1	0	0	0	1	23	2020-01-06	24	0.8	2020-01-30	1
2020001951	1	4.01	1	6.0898	1	0	66	0	0	0	0	0	0	2	3	1	0	0	90	0	52.75	43.2	187.7	0	3.5	0	0	0	0	0	0	12	2020-01-06	1211	40.3667	2023-05-01	1
2020001958	1	3.61	1	4.66939	1	0	77	1	0	1	1	1	0	1	1	0	0	0	62	1	54	47.4	260.2	0	3.5	0	1	0	1	1	0	27	2020-01-06	1302	43.4	2023-07-31	0
2020002321	0	9.87	0	5.92	1	0	67	0	1	0	0	0	0	2	2	0	0	0	102	0	59.3	52.2	273	0	3.5	0	0	0	0	1	0	18	2020-01-07	1301	43.3667	2023-07-31	0
2020002446	0	5.19	0	9.79271	0	0	69	0	0	0	0	0	1	1	3	1	0	0	108	0	51.6	43.8	150.2	1	5.5	1	0	0	0	0	0	21	2020-01-07	1301	43.3667	2023-07-31	0
2020002691	0	6.59	0	6.13878	1	0	66	0	0	0	0	0	0	1	3	1	1	1	88	0	52.8	48.4	181.7	0	5.67	1	0	0	0	0	0	15	2020-01-08	1300	43.3333	2023-07-31	0
2020003492	0	4.99	0	4.83663	0	1	67	0	0	0	0	0	0	1	1	0	0	0	115	0	51.65	47.9	150.6	1	3	0	0	0	0	1	0	21	2020-01-10	1298	43.2667	2023-07-31	0
2020003709	0	4.12	0	3.89062	1	1	74	1	0	0	1	1	0	0	2	0	0	0	102	0	56.55	46.4	188.7	0	4	1	0	0	0	0	0	20	2020-01-10	1298	43.2667	2023-07-31	0
2020004043	0	7.9	0	5.8157	1	0	65	0	1	1	0	0	0	1	3	1	2	1	89	0	51.5	41.2	205.5	0	3	0	0	0	0	0	0	16	2020-01-11	1297	43.2333	2023-07-31	0
2020004444	0	5.8	0	3.85397	1	0	67	0	0	0	0	0	0	2	3	1	1	1	137	0	47.65	40.9	161.5	0	4.5	1	0	0	0	0	0	20	2020-01-13	215	7.16667	2020-08-15	1
2020004465	0	5.87	0	4.97607	1	0	79	1	0	0	1	1	1	1	2	0	0	0	101	0	49.1	42.9	182.2	0	4.33	1	1	0	0	0	0	44	2020-01-13	1005	33.5	2022-10-14	1
2020004493	0	4.07	0	5.67303	0	1	68	0	0	0	1	1	0	1	3	1	0	0	80	0	49.3	44	133.4	1	5	1	0	0	0	0	0	16	2020-01-13	1295	43.1667	2023-07-31	0
2020004586	0	3.74	0	4.35094	0	1	75	1	1	0	2	1	0	1	1	0	1	1	74	1	46.7	39.1	161	0	3	0	1	0	0	0	0	18	2020-01-13	945	31.5	2022-08-15	1
2020005572	0	4.76	0	3.63504	1	1	67	0	0	0	0	0	0	1	3	1	1	1	113	0	54.5	47.6	178.9	0	2.5	0	1	0	0	0	0	16	2020-01-15	1293	43.1	2023-07-31	0
2020005844	0	6.86	0	4.0423	1	0	68	0	0	0	0	0	0	2	3	1	0	0	114	0	58.75	48.9	124	1	4.67	1	0	0	0	0	0	18	2020-01-17	1266	42.2	2023-07-06	1
2020006480	0	2.84	1	4.66798	0	1	67	0	0	0	0	0	0	1	1	0	0	0	78	1	59.45	46.6	246.3	0	2.5	0	0	0	0	0	0	14	2020-01-18	1290	43	2023-07-31	0
2020007257	0	6.2	0	3.7459	1	0	65	0	0	0	0	0	0	1	3	1	0	0	116	0	44.2	37.6	194.9	0	3.33	0	0	0	1	1	0	52	2020-01-21	1287	42.9	2023-07-31	0
2020007269	0	4.5	0	4.95514	1	0	73	1	0	0	1	1	1	1	3	1	0	0	69	1	46.35	39.5	162.5	0	6.33	1	1	0	1	0	0	20	2020-01-21	1287	42.9	2023-07-31	0
2020008277	0	7.49	0	6.26263	1	0	67	0	0	0	0	0	0	1	3	1	3	1	121	0	52.15	46.6	191.2	0	5.5	1	0	0	0	0	0	17	2020-01-28	1280	42.6667	2023-07-31	0
2020008279	0	6.2	0	8.96	0	0	76	1	1	0	1	1	0	1	2	0	0	0	88	0	52.3	47.6	204.8	0	4.5	1	0	0	0	0	0	18	2020-01-28	1280	42.6667	2023-07-31	0
2020008309	0	4.18	0	3.47882	1	1	73	1	0	1	1	1	0	1	1	0	0	0	97	0	55.5	47.5	220.1	0	2.67	0	0	0	0	0	0	12	2020-01-28	446	14.8667	2021-04-18	1
2020008546	1	2.59	1	3.84	1	1	74	1	0	0	1	1	0	1	3	1	1	1	48	1	51.35	45.5	120.6	1	4	1	1	1	0	0	0	43	2020-01-29	1279	42.6333	2023-07-31	0
2020008791	0	2.89	1	4.60059	0	1	72	1	1	0	2	1	0	2	2	0	0	0	91	0	53.1	43.4	198.5	0	4	1	0	0	0	0	0	13	2020-01-30	1278	42.6	2023-07-31	0
2020008861	0	5.21	0	6.52508	0	0	71	1	1	0	1	1	1	1	1	0	1	1	129	0	51.85	46.6	213.8	0	3.5	0	1	0	0	0	0	22	2020-01-30	1278	42.6	2023-07-31	0
2020008887	0	8.46	0	5.64898	1	0	70	1	0	0	1	1	1	1	3	1	1	1	121	0	47.9	41.4	179.8	0	3	0	1	0	0	0	0	14	2020-01-30	1278	42.6	2023-07-31	0
2020008890	0	5.1	0	4.14196	0	1	68	0	1	0	1	1	0	0	1	0	1	1	74	1	59.1	46.1	201.4	0	3.33	0	0	0	0	0	0	16	2020-01-30	1278	42.6	2023-07-31	0
2020008893	1	2.54	1	3.26376	1	1	65	0	1	0	0	0	0	0	1	0	0	0	91	0	47.4	37.9	139.3	1	4	1	1	0	0	1	0	21	2020-01-30	828	27.6	2022-05-07	1
2020009448	0	5.34	0	5.50241	1	0	75	1	0	0	0	0	1	2	3	1	0	0	104	0	48.7	38.3	172.1	0	2.67	0	0	0	0	0	0	17	2020-02-01	1143	38.1	2023-03-20	1
2020009637	0	2.81	1	4.05161	0	1	71	1	0	0	1	1	0	1	3	1	0	0	32	1	54.95	46.8	167.4	0	3	0	0	0	0	0	0	13	2020-02-02	1275	42.5	2023-07-31	0
2020009951	1	3.4	1	3.70315	1	0	71	1	0	0	1	1	0	1	3	1	0	0	74	1	46.5	38.9	178.5	0	4.5	1	0	0	0	0	0	39	2020-02-03	393	13.1	2021-03-02	1
2020010219	0	2.76	1	4.01662	0	1	74	1	0	1	0	0	0	1	1	0	0	0	68	1	48.1	43.9	157.7	1	3.66	0	0	0	0	1	0	14	2020-02-04	1273	42.4333	2023-07-31	0
2020010462	0	4.25	0	4.2206	0	1	73	1	1	0	1	1	1	1	3	1	1	1	69	1	46.2	39.8	112	1	6.66	1	0	0	0	0	0	12	2020-02-07	1270	42.3333	2023-07-31	0
2020010500	0	5.96	0	4.47514	1	0	66	0	0	0	0	0	0	0	1	0	0	0	106	0	51	48.5	201	0	4	1	0	0	0	0	0	18	2020-02-08	893	29.7667	2022-07-20	1
2020010734	0	3.05	1	7.41767	0	0	82	1	1	0	0	0	0	1	3	1	0	0	82	0	48.5	39.3	166	0	3	0	0	0	0	0	0	19	2020-02-11	1256	41.8667	2023-07-21	1
2020011625	0	3.72	0	4.31956	0	1	70	1	0	1	0	0	0	1	3	1	1	1	89	0	47	39.5	132	1	4	1	0	0	0	0	0	19	2020-02-19	1258	41.9333	2023-07-31	0
2020011630	0	6.37	0	7.79846	0	0	69	0	1	0	1	1	0	1	2	0	0	0	118	0	45.65	40.2	219.9	0	5	1	0	0	0	0	0	15	2020-02-19	1258	41.9333	2023-07-31	0
2020012256	0	5.19	0	6.68503	0	0	67	0	0	0	2	1	0	0	3	1	1	1	89	0	59.85	46.7	216.1	0	3	0	0	0	0	0	0	14	2020-02-24	1253	41.7667	2023-07-31	0
2020012343	0	4.64	0	3.57315	1	0	77	1	1	0	1	1	1	1	3	1	3	1	100	0	57	39.6	161.6	0	7	1	0	0	0	0	0	16	2020-02-24	709	23.6333	2022-02-02	1
2020012514	1	3.85	1	5.37129	1	0	73	1	1	0	0	0	1	2	3	1	2	1	71	1	53.6	45.7	239.6	0	3	0	0	0	0	1	0	13	2020-02-25	315	10.5	2021-01-05	1
2020012806	0	4.13	0	6.04487	0	1	76	1	0	0	1	1	0	1	2	0	0	0	89	0	49.4	40.3	206.4	0	4	1	0	0	1	0	0	11	2020-02-26	1251	41.7	2023-07-31	0
2020012818	1	2.94	1	2.87105	1	1	71	1	1	0	0	0	0	0	3	1	1	1	108	0	46.8	38.7	165.3	0	3.5	0	1	0	0	0	0	20	2020-02-26	1057	35.2333	2023-01-18	1
2020012984	0	4.89	0	5.39966	0	1	68	0	0	0	1	1	0	1	3	1	3	1	72	1	60.75	53.7	261.9	0	5	1	0	0	0	0	0	12	2020-02-27	1250	41.6667	2023-07-31	0
2020013533	1	3.15	1	2.68252	1	1	79	1	0	0	0	0	0	1	3	1	0	0	106	0	54.25	42.4	181.8	0	4	1	0	0	0	0	0	12	2020-03-01	1164	38.8	2023-05-09	1
2020014979	0	7.38	0	5.27682	1	0	65	0	0	0	0	0	0	2	3	1	0	0	88	0	54.5	48.8	225.6	0	2.5	0	0	0	0	0	0	17	2020-03-09	1146	38.2	2023-04-29	1
2020015026	0	5.71	0	3.51557	1	0	66	0	0	0	0	0	0	0	3	1	0	0	111	0	53.2	46.9	191.4	0	4.5	1	0	0	0	1	0	19	2020-03-08	1240	41.3333	2023-07-31	0
2020015821	0	4.48	0	8.60938	0	0	75	1	0	0	1	1	1	1	1	0	0	0	85	0	47.8	46.9	207.1	0	4.5	1	1	0	0	0	1	2	2020-03-11	2	0.0666667	2020-03-12	1
2020015826	0	3.82	0	5.31556	0	1	81	1	0	0	0	0	0	1	1	0	2	1	86	0	61.45	46.8	207.7	0	4.67	1	0	0	0	0	0	16	2020-03-11	1143	38.1	2023-04-28	1
2020016236	0	7.11	0	7.23714	0	0	75	1	0	0	1	1	0	2	3	1	0	0	83	0	52.1	47.6	172.1	0	3.33	0	0	0	0	1	0	9	2020-03-13	1235	41.1667	2023-07-12	0
2020016334	0	4.1	1	6.62284	0	0	69	0	0	0	0	0	1	2	2	0	1	1	96	0	47.8	41.5	219.3	0	2.5	0	0	0	0	0	0	11	2020-03-13	1154	38.4667	2023-05-11	1
2020016382	1	4.24	1	3.60332	1	0	69	0	1	1	0	0	0	1	3	1	0	0	85	0	49.05	45	162.5	0	5.67	1	0	0	0	0	0	19	2020-03-13	1235	41.1667	2023-07-31	0
2020016496	0	6.13	0	7.20312	0	1	75	1	0	0	1	1	0	0	1	0	0	0	95	0	52.5	44.1	210.5	0	4.67	1	0	0	0	0	0	11	2020-03-14	1234	41.1333	2023-07-31	0
2020016962	1	2.79	1	3.13147	1	1	74	1	1	0	1	1	1	1	3	1	0	0	89	0	53.7	47.7	216.4	0	3.5	0	1	0	0	1	0	13	2020-03-16	1175	39.1667	2023-06-04	1
2020017147	1	4.04	1	3.16263	1	0	71	1	0	0	0	0	0	0	3	1	0	0	64	1	45.35	37.4	199.8	0	2.67	0	0	0	0	0	0	14	2020-03-17	1231	41.0333	2023-07-31	0
2020017170	0	7.92	0	6.02582	1	0	67	0	0	0	1	1	0	1	2	0	0	0	92	0	54.65	50.1	244.1	0	3.5	0	0	0	0	0	0	18	2020-03-17	1027	34.2333	2023-01-08	1
2020017484	0	6.21	0	5.92404	1	0	70	1	1	1	1	1	0	2	2	0	0	0	96	0	51.25	46	229.7	0	3	0	0	0	0	0	0	9	2020-03-18	1230	41	2023-07-31	0
2020017842	1	3.2	1	6.31304	1	0	77	1	1	0	1	1	0	1	3	1	0	0	63	1	49.3	43	176.6	0	4	1	0	1	1	1	0	43	2020-03-19	612	20.4	2021-11-21	1
2020017900	0	5.97	0	5.53202	1	0	66	0	0	0	0	0	0	1	2	0	0	0	130	0	46.85	40	224.2	0	2.5	0	0	0	0	0	0	11	2020-03-19	1229	40.9667	2023-07-31	0
2020017947	1	1.85	1	3.00444	1	1	74	1	0	0	0	0	0	1	3	1	0	0	46	1	42.95	36.3	99.1	1	6	1	1	1	0	1	0	49	2020-03-19	723	24.1	2022-03-12	1
2020017977	0	7.55	0	6.00198	1	0	67	0	0	0	1	1	1	1	3	1	1	1	108	0	49.65	44.1	187.3	0	4.5	1	0	0	0	0	0	8	2020-03-19	1065	35.5	2023-02-17	1
2020018082	0	6.89	0	7.03759	0	0	66	0	0	0	1	1	1	1	3	1	0	0	100	0	57.3	47.8	194.1	0	2.67	0	0	0	0	0	0	26	2020-03-20	1228	40.9333	2023-07-31	0
2020018089	0	4.58	0	4.76444	0	1	70	1	0	0	1	1	0	2	3	1	1	1	96	0	57.95	47.9	189.6	0	2.67	0	0	0	0	0	0	13	2020-03-20	1228	40.9333	2023-07-31	0
2020018592	0	4.77	0	4.30229	0	1	72	1	0	0	0	0	0	1	3	1	0	0	91	0	54.9	42.7	180.5	0	4.33	1	0	0	0	0	0	11	2020-03-22	1154	38.4667	2023-05-20	1
2020018960	1	2.96	1	5.30078	1	0	73	1	0	0	0	0	0	0	3	1	0	0	79	1	48.65	43.2	203.1	0	6	1	0	0	0	0	0	21	2020-03-23	1225	40.8333	2023-07-31	0
2020019185	1	2.08	1	3.1384	1	1	80	1	1	0	0	0	0	1	3	1	1	1	75	1	55.65	47.6	160.5	0	4	1	0	0	0	0	0	11	2020-03-24	933	31.1	2022-10-13	1
2020019619	0	4.41	0	4.28125	1	0	76	1	0	0	2	1	0	2	3	1	2	1	65	1	54.95	45.6	222.6	0	4.5	1	0	0	0	0	0	9	2020-03-25	1032	34.4	2023-01-21	1
2020019642	0	7.08	0	4.81139	1	0	69	0	0	0	0	0	0	1	3	1	0	0	85	0	57.15	47.4	188.1	0	3.5	0	0	0	0	1	0	12	2020-04-03	1214	40.4667	2023-07-31	0
2020020411	0	7.14	0	5.6583	1	0	72	1	1	1	1	1	0	2	3	1	0	0	106	0	58.7	46.8	177.1	0	4.67	1	0	0	0	0	0	11	2020-03-28	1220	40.6667	2023-07-31	0
2020020439	0	6.64	0	6.15768	1	0	69	0	0	0	0	0	0	1	2	0	3	1	118	0	43.6	36.3	162.5	0	5.67	1	1	0	0	0	0	17	2020-03-28	298	9.93333	2021-01-20	1
2020020543	0	4.5	0	5.32872	1	0	65	0	0	0	0	0	1	1	3	1	0	0	72	1	41.75	36.6	183.4	0	5.67	1	0	0	0	0	0	10	2020-03-29	1188	39.6	2023-06-30	1
2020020891	0	5.43	0	9.04498	0	0	68	0	1	0	0	0	0	1	3	1	0	0	100	0	48.45	44.3	188.1	0	3.5	0	0	0	0	1	0	15	2020-03-30	1162	38.7333	2023-06-05	1
2020021138	0	6.89	0	6.68186	0	0	73	1	1	0	0	0	1	1	3	1	1	1	95	0	46.1	39.2	152.2	1	3	0	0	0	0	0	0	13	2020-04-08	685	22.8333	2022-02-22	1
2020021159	0	4.97	0	4.49135	1	0	72	1	0	0	0	0	0	2	3	1	1	1	129	0	51.45	42.7	186.5	0	3.66	0	0	0	0	0	0	10	2020-03-31	844	28.1333	2022-07-23	1
2020021682	1	2.27	1	2.41617	1	1	76	1	0	0	0	0	0	1	3	1	0	0	63	1	50.55	46.1	164.8	0	4.5	1	0	0	0	0	0	17	2020-04-02	1180	39.3333	2023-06-26	1
2020021685	0	6	0	5.17188	0	1	66	0	1	1	1	1	0	1	3	1	0	0	93	0	55.95	47.2	211	0	3.5	0	0	0	0	0	0	17	2020-04-08	1008	33.6	2023-01-11	1
2020021863	1	3.32	1	5.34188	1	0	78	1	0	0	0	0	1	1	3	1	0	0	61	1	57.85	47.7	187.6	0	5.33	1	0	0	1	0	0	11	2020-04-02	1104	36.8	2023-04-11	1
2020022240	0	4.68	0	5.52433	1	0	72	1	0	0	1	1	1	1	2	0	0	0	93	0	45.85	38.7	185.1	0	2.5	0	0	0	0	1	0	21	2020-04-04	1213	40.4333	2023-07-31	0
2020022478	0	4.32	0	4.66352	0	1	71	1	0	0	1	1	0	1	1	0	0	0	64	1	53.55	45.3	161.1	0	3	0	0	0	0	0	0	12	2020-04-08	1209	40.3	2023-07-31	0
2020022578	0	5.31	0	3.47971	1	1	69	0	0	0	1	1	0	1	2	0	0	0	95	0	53.1	49.1	222	0	4	1	0	0	0	0	0	11	2020-04-06	460	15.3333	2021-07-10	1
2020023065	0	7.06	0	5.54325	1	0	75	1	0	0	2	1	0	2	2	0	0	0	95	0	55.3	42.6	257.1	0	4	1	0	0	0	0	0	17	2020-04-07	1210	40.3333	2023-07-31	0
2020023391	0	4.88	0	5.21947	1	0	65	0	0	0	0	0	1	1	1	0	0	0	75	1	52.4	44.4	189.2	0	3.5	0	1	1	0	0	0	58	2020-04-08	1209	40.3	2023-07-31	0
2020023445	0	4.04	0	3.67561	1	1	74	1	1	1	1	1	0	1	2	0	0	0	53	1	60.85	50.8	225	0	3.66	0	0	0	0	0	0	9	2020-04-08	1209	40.3	2023-07-31	0
2020023831	0	5.94	0	6.63344	0	0	71	1	0	0	2	1	1	0	3	1	1	1	89	0	50.4	40.8	191.6	0	4.5	1	1	0	1	1	0	26	2020-04-09	1208	40.2667	2023-07-31	0
2020023966	0	4.72	0	3.55556	1	1	72	1	1	0	0	0	0	0	1	0	0	0	92	0	49.5	41.3	163.5	0	4	1	0	0	0	0	0	10	2020-04-10	805	26.8333	2022-06-24	1
2020023972	0	5.34	0	4.61432	1	0	78	1	0	1	1	1	0	1	3	1	0	0	82	0	49.95	43.9	165.1	0	3.66	0	0	0	0	0	0	14	2020-04-22	1195	39.8333	2023-07-31	0
2020024179	0	5.68	0	4.41506	1	0	74	1	0	0	0	0	0	2	2	0	0	0	111	0	55.95	45.5	150	1	2.67	0	0	0	0	1	0	12	2020-04-10	683	22.7667	2022-02-22	1
2020024454	0	3.55	1	6.80435	0	0	73	1	1	1	1	1	1	1	3	1	3	1	92	0	41.3	31.8	153.8	1	4.67	1	0	0	0	0	0	13	2020-04-12	655	21.8333	2023-07-31	1
2020024506	1	4.09	1	3.81267	1	0	67	0	0	0	0	0	0	2	3	1	3	1	74	1	55.7	48.1	178.7	0	3	0	0	0	0	0	0	9	2020-04-11	892	29.7333	2022-09-20	1
2020024874	0	6.01	0	6.73646	0	0	65	0	0	0	1	1	0	1	3	1	0	0	88	0	54.05	50	208.2	0	3.5	0	0	0	0	0	0	20	2020-04-13	1078	35.9333	2023-03-27	1
2020024999	1	4.36	1	4.17578	1	0	75	1	0	0	0	0	1	1	3	1	1	1	96	0	53.4	48.4	174.7	0	3.5	0	0	0	0	0	0	20	2020-04-13	1127	37.5667	2023-05-15	1
2020025174	0	4.82	0	5.48996	0	1	70	1	1	0	2	1	0	1	3	1	2	1	98	0	59.5	52.9	236.7	0	4	1	1	0	0	0	0	12	2020-04-13	1204	40.1333	2023-07-31	0
2020025439	0	5.91	0	4.33424	0	1	67	0	0	0	0	0	0	1	2	0	0	0	89	0	47.6	42.8	177.1	0	3	0	0	0	0	0	0	17	2020-04-14	1203	40.1	2023-07-31	0
2020025443	1	3.11	1	3.51705	1	1	67	0	0	0	0	0	0	0	2	0	2	1	74	1	57.75	47.3	183.1	0	3	0	0	0	0	0	0	11	2020-04-19	1198	39.9333	2023-07-31	0
2020025486	0	4.5	0	7.33843	0	0	76	1	0	0	1	1	0	1	1	0	0	0	77	1	49.2	44.2	236.5	0	3	0	0	0	0	0	0	12	2020-04-14	1203	40.1	2023-07-31	0
2020026089	0	3.03	1	7.64844	0	1	75	1	0	0	1	1	0	0	3	1	1	1	49	1	56.35	49.3	232.4	0	4.33	1	0	0	0	0	0	13	2020-04-16	599	19.9667	2021-12-06	1
2020026149	0	6.15	0	4.68512	1	0	65	0	0	0	1	1	0	1	2	0	0	0	86	0	58.4	46.3	197.4	0	3.66	0	1	1	0	1	0	44	2020-04-16	1201	40.0333	2023-07-31	0
2020026400	1	2.49	1	2.20558	1	1	68	0	0	0	0	0	0	1	1	0	0	0	79	1	49.8	44.3	194.4	0	4.33	1	0	0	0	0	0	12	2020-04-17	1200	40	2023-07-31	0
2020026532	1	2.74	1	2.36444	1	1	75	1	1	0	0	0	0	1	3	1	0	0	79	1	59.45	45.3	195	0	4	1	0	0	0	0	0	15	2020-04-17	689	22.9667	2022-03-07	1
2020026567	1	3.2	1	2.74348	1	1	66	0	0	0	1	1	0	1	2	0	0	0	95	0	56.5	49	203.8	0	3.66	0	0	0	0	1	0	18	2020-04-22	1195	39.8333	2023-07-31	0
2020026600	0	2.92	1	4.23855	0	1	69	0	1	1	0	0	0	1	3	1	1	1	63	1	54.3	39.7	170.1	0	4	1	0	0	0	0	0	23	2020-04-17	1119	37.3	2023-05-11	1
2020027312	1	4.33	1	4.26383	1	0	70	1	1	0	1	1	0	1	3	1	0	0	88	0	44.05	41	164.6	0	3	0	1	1	0	1	0	43	2020-04-20	1197	39.9	2023-07-31	0
2020028368	0	3.18	1	7.35	0	1	82	1	0	0	2	1	0	1	3	1	0	0	63	1	52.5	44.9	183.9	0	3	0	0	0	0	0	0	21	2020-04-23	907	30.2333	2022-10-17	1
2020028530	1	2.72	1	2.69333	1	1	73	1	0	0	0	0	0	1	3	1	0	0	81	0	54.8	46.5	176.5	0	4.67	1	1	0	1	0	0	16	2020-04-23	1194	39.8	2023-07-31	0
2020028726	0	5.74	0	5.91368	1	0	65	0	1	0	0	0	1	1	1	0	0	0	84	0	50.25	40.5	222.2	0	2.67	0	1	0	0	0	0	19	2020-04-27	1190	39.6667	2023-07-31	0
2020028765	1	3.06	1	3.62426	1	1	75	1	0	0	1	1	0	1	2	0	0	0	75	1	58.05	44.5	221	0	2.67	0	1	0	0	1	0	13	2020-04-28	1189	39.6333	2023-07-31	0
2020028984	0	4.36	0	5.66391	0	1	65	0	0	0	0	0	0	2	2	0	0	0	79	1	58.25	47.3	170.2	0	2.67	0	1	0	0	0	0	17	2020-04-26	1191	39.7	2023-07-31	0
2020029049	0	7.11	0	4.2699	1	0	67	0	0	0	0	0	0	2	3	1	3	1	117	0	62.45	46.6	180.4	0	5.33	1	0	0	0	0	0	10	2020-04-29	508	16.9333	2021-09-19	1
2020029600	0	8.34	0	10.2537	0	0	67	0	1	0	1	1	1	0	2	0	0	0	100	0	54.2	49	231.5	0	2.67	0	0	0	0	0	0	17	2020-05-01	1186	39.5333	2023-07-31	0
2020029629	0	7.66	0	5.29467	1	0	67	0	1	1	1	1	0	2	1	0	0	0	113	0	58	50.6	272.8	0	2.67	0	0	0	0	0	0	12	2020-04-30	1187	39.5667	2023-07-31	0
2020029755	1	4.21	1	3.69896	1	0	69	0	0	0	1	1	0	1	3	1	0	0	79	1	54.7	48.6	221.4	0	4.33	1	0	0	0	0	0	12	2020-04-29	570	19	2021-11-20	1
2020029945	0	5.42	0	5.40138	1	0	68	0	0	0	1	1	1	1	3	1	1	1	72	1	52.15	46.3	230.3	0	2.5	0	0	0	0	0	0	28	2020-04-29	1188	39.6	2023-07-31	0
2020030269	0	6.44	0	5.49878	1	0	71	1	0	0	0	0	1	1	1	0	0	0	113	0	53.35	48.3	193.1	0	3	0	0	0	0	1	0	16	2020-05-01	1186	39.5333	2023-07-31	0
2020030723	0	5.39	0	3.11478	1	1	68	0	0	0	1	1	0	1	2	0	0	0	73	1	49.9	43.8	208.1	0	3	0	0	0	0	0	0	10	2020-05-03	1184	39.4667	2023-07-31	0
2020030988	0	5.81	0	6.54041	0	0	65	0	1	0	0	0	1	1	2	0	0	0	113	0	49.75	43.8	194.8	0	5	1	1	0	0	0	0	14	2020-05-04	1183	39.4333	2023-07-31	0
2020031800	0	4.62	0	6.05859	1	0	77	1	0	0	0	0	0	1	2	0	0	0	59	1	45.3	41	160.7	0	3.5	0	0	0	0	0	0	12	2020-05-06	1181	39.3667	2023-07-31	0
2020031931	0	7.22	0	5.70774	1	0	67	0	0	0	1	1	0	1	1	0	0	0	99	0	53.05	48.4	228.2	0	5	1	0	0	0	0	0	14	2020-05-09	1178	39.2667	2023-07-31	0
2020032134	0	4.87	0	6.4573	0	0	70	1	1	0	1	1	1	2	3	1	0	0	88	0	58.35	50.6	255.4	0	6	1	0	0	0	0	0	10	2020-05-08	1116	37.2	2023-05-29	1
2020032266	0	5.19	0	3.97372	0	1	68	0	0	1	1	1	0	1	3	1	1	1	97	0	50.9	45.9	200.9	0	3	0	0	0	0	0	0	12	2020-05-07	828	27.6	2022-08-13	1
2020032561	0	5.93	0	6.8702	0	0	70	1	0	0	0	0	0	1	3	1	0	0	88	0	62.7	52.5	193.6	0	3	0	0	0	0	0	0	14	2020-05-07	887	29.5667	2022-10-11	1
2020032570	0	7.4	0	5.30552	1	0	68	0	0	0	0	0	0	2	2	0	1	1	112	0	53.05	44.5	212.9	0	3.33	0	0	0	0	0	0	14	2020-05-08	1179	39.3	2023-07-31	0
2020032603	1	4.34	1	5.38974	1	0	65	0	0	0	0	0	1	1	1	0	0	0	91	0	52.5	46.4	197.5	0	4	1	0	0	0	0	0	11	2020-05-07	386	12.8667	2021-05-28	1
2020032735	0	6.06	0	6.96925	0	0	65	0	0	0	1	1	1	1	3	1	1	1	116	0	49.55	43	225.4	0	5	1	0	0	0	0	0	13	2020-05-08	1105	36.8333	2023-05-18	1
2020033068	0	4.74	0	5.60795	1	0	67	0	0	0	0	0	0	1	1	0	0	0	75	1	53.25	46.3	196.3	0	2.5	0	0	0	0	0	0	18	2020-05-09	1137	37.9	2023-06-20	1
2020033121	0	6.21	0	5.34619	1	0	84	1	0	0	1	1	0	1	3	1	1	1	106	0	50.05	41.8	160.2	0	3	0	0	0	0	0	0	11	2020-05-09	484	16.1333	2021-09-05	1
2020033254	0	4.56	0	6.75202	0	0	68	0	0	0	0	0	0	2	3	1	0	0	89	0	50.85	39.6	243.8	0	3.5	0	0	0	0	0	0	19	2020-05-10	926	30.8667	2022-11-22	1
2020033651	0	3.84	0	3.60094	1	1	70	1	0	0	0	0	0	1	1	0	0	0	112	0	46.2	37.7	159	1	2.5	0	0	0	0	0	0	20	2020-05-11	1176	39.2	2023-07-31	0
2020033714	1	3.78	1	4.94031	1	0	74	1	0	0	0	0	0	1	1	0	0	0	88	0	53.15	43.9	194	0	3	0	0	0	0	0	0	19	2020-05-11	716	23.8667	2022-04-27	1
2020034516	0	5.26	0	8.03704	0	0	68	0	0	0	0	0	1	1	3	1	0	0	80	0	49.6	41	233.7	0	2.67	0	0	0	0	0	0	12	2020-05-20	1167	38.9	2023-07-31	0
2020034603	0	4.03	0	4.35938	0	1	67	0	1	0	0	0	0	1	1	0	0	0	93	0	54.55	49.1	241.7	0	3.33	0	0	0	1	0	0	14	2020-05-13	1174	39.1333	2023-07-31	0
2020035023	0	7.79	0	5.00946	1	0	68	0	0	0	1	1	0	1	1	0	0	0	77	1	48.3	43.3	194	0	3.5	0	0	0	0	0	0	16	2020-05-15	800	26.6667	2022-07-24	1
2020035033	0	6.85	0	4.92195	1	0	73	1	0	0	1	1	1	1	3	1	0	0	105	0	54.7	44.9	191	0	2.5	0	1	0	0	0	0	20	2020-05-14	1173	39.1	2023-07-31	0
2020035052	0	4.32	1	6.942	0	0	78	1	1	0	1	1	1	1	2	0	1	1	77	1	47.4	39.7	186.3	0	2.67	0	0	0	0	1	0	14	2020-05-15	1172	39.0667	2023-07-31	0
2020035224	0	4.53	0	6.40384	0	0	65	0	0	0	0	0	0	1	3	1	1	1	64	1	51.3	41.5	171.4	0	2.5	0	0	0	0	0	0	12	2020-05-15	1172	39.0667	2023-07-31	0
2020035492	0	4.79	0	4.56933	0	1	76	1	0	0	1	1	0	1	2	0	2	1	97	0	55.6	44.4	170	0	3	0	1	0	0	1	0	10	2020-05-16	667	22.2333	2022-03-14	1
2020035693	0	4.62	0	4.62019	0	1	71	1	0	0	0	0	0	1	3	1	1	1	100	0	53.95	38	150.1	1	3	0	0	0	0	0	0	19	2020-05-17	1170	39	2023-07-31	0
2020035865	1	4.19	1	3.46015	1	0	69	0	0	0	0	0	1	1	2	0	0	0	108	0	56	48.7	239.5	0	2.67	0	1	0	1	0	0	33	2020-05-17	1170	39	2023-07-31	0
2020035944	0	4.77	0	6.19143	1	0	84	1	0	0	2	1	1	1	3	1	0	0	121	0	53.75	46	200.1	0	3	0	0	0	0	0	0	18	2020-05-18	654	21.8	2022-03-03	1
2020036015	0	5.44	0	3.11342	1	1	67	0	0	0	0	0	0	2	2	0	0	0	80	0	54.55	46.9	220.6	0	2.5	0	0	0	0	0	0	17	2020-05-18	1169	38.9667	2023-07-31	0
2020036292	0	4.43	0	4.09766	1	0	72	1	1	1	0	0	1	1	1	0	0	0	93	0	46.85	36.7	171.3	0	5.67	1	0	0	0	0	0	14	2020-05-19	1168	38.9333	2023-07-31	0
2020036426	1	4.13	1	3.89965	1	0	68	0	0	0	0	0	0	1	3	1	0	0	96	0	53.85	44.8	188.7	0	2.5	0	0	1	0	1	0	30	2020-05-20	1167	38.9	2023-07-31	0
2020036872	1	3.63	1	2.24197	1	0	77	1	1	1	0	0	1	1	1	0	0	0	125	0	51.45	42.1	198.5	0	2.5	0	1	0	0	0	0	16	2020-06-19	1137	37.9	2023-07-31	0
2020037037	1	3.51	1	5.57734	1	0	70	1	0	0	0	0	0	0	3	1	0	0	60	1	50.9	45.4	252.8	0	3.5	0	0	0	0	0	0	17	2020-05-21	1166	38.8667	2023-07-31	0
2020037074	1	3.35	1	4.49057	1	0	72	1	0	0	0	0	1	1	3	1	0	0	89	0	55.25	43.8	199.9	0	5.67	1	0	0	1	0	0	15	2020-05-21	1166	38.8667	2023-07-31	0
2020037281	0	3.97	0	5.40779	0	1	68	0	0	1	0	0	0	0	1	0	0	0	59	1	48.75	34.8	151.8	1	2.5	0	0	0	0	0	0	11	2020-05-21	1166	38.8667	2023-07-31	0
2020037287	0	3.51	0	4.55191	0	1	65	0	0	0	1	1	0	1	2	0	0	0	113	0	50.2	43.8	231	0	2.67	0	0	0	0	0	0	10	2020-07-02	1124	37.4667	2023-07-31	0
2020037469	1	2.59	1	1.95717	1	1	65	0	1	0	2	1	0	1	2	0	0	0	103	0	58.35	49.8	251.4	0	4.5	1	0	0	0	0	0	19	2020-05-23	834	27.8	2022-09-04	1
2020037719	0	4.61	0	3.02112	1	1	72	1	0	0	1	1	0	0	3	1	0	0	65	1	53.5	44.7	208.7	0	2.67	0	0	0	0	0	0	11	2020-05-24	1163	38.7667	2023-07-31	0
2020038784	0	4.93	0	4.15023	0	1	67	0	0	0	0	0	0	0	3	1	0	0	126	0	48.35	40.1	153.3	1	4.67	1	1	0	0	1	0	16	2020-05-26	432	14.4	2021-08-01	1
2020038939	0	5.01	0	5.37773	0	1	68	0	0	0	0	0	0	1	3	1	0	0	76	1	56.55	46.7	242	0	2.67	0	0	0	0	0	0	11	2020-05-27	1160	38.6667	2023-07-31	0
2020039031	0	3.48	1	6.80469	0	0	77	1	0	0	1	1	0	1	3	1	0	0	75	1	47.1	41.8	153	1	3.5	0	0	0	0	1	0	22	2020-05-27	585	19.5	2022-01-02	1
2020039623	0	5.4	0	6.29938	1	0	67	0	0	0	0	0	0	1	1	0	0	0	85	0	47	40.5	203.8	0	3.5	0	0	0	0	0	0	18	2020-05-29	1158	38.6	2023-07-31	0
2020039670	0	5.66	0	6.60836	0	0	66	0	1	0	0	0	1	1	3	1	0	0	72	1	50.25	45.1	249.8	0	3	0	0	1	0	0	0	18	2020-05-29	1158	38.6	2023-07-31	0
2020039714	1	3	1	4.1364	1	0	78	1	0	0	0	0	0	1	2	0	0	0	78	1	46.75	39.8	168.9	0	2.67	0	0	0	0	0	0	12	2020-05-29	273	9.1	2021-02-26	1
2020039976	0	6.5	0	6.5576	0	0	68	0	0	0	0	0	0	1	2	0	2	1	102	0	52.8	47.6	195	0	2.67	0	0	0	0	0	0	19	2020-05-30	1077	35.9	2023-05-12	1
2020040066	0	5.96	0	3.4815	1	0	73	1	0	0	0	0	0	1	1	0	1	1	82	0	49	43.8	231.4	0	2.67	0	0	1	0	0	0	11	2020-05-30	387	12.9	2021-06-21	1
2020040313	1	3.22	1	4.51595	1	0	76	1	0	0	0	0	0	1	3	1	0	0	73	1	44.5	37.7	105.4	1	2.67	0	0	0	0	0	0	8	2020-05-31	1156	38.5333	2023-07-31	0
2020040495	1	3.28	1	5.391	1	0	77	1	1	0	0	0	1	2	1	0	0	0	94	0	49.4	41.5	279.3	0	4	1	0	0	0	0	0	8	2020-06-01	1155	38.5	2023-07-31	0
2020040546	0	7.44	0	6.13474	1	0	75	1	0	0	1	1	1	0	2	0	0	0	113	0	43.9	40.7	191.1	0	3.5	0	1	1	0	1	0	25	2020-06-01	744	24.8	2022-06-15	1
2020040745	0	7.92	0	4.85103	1	0	65	0	0	0	0	0	0	1	3	1	1	1	142	0	53.35	47.1	253.6	0	3.66	0	0	0	0	0	0	16	2020-06-01	1155	38.5	2023-07-31	0
2020040830	1	3.07	1	3.2501	1	0	71	1	1	0	0	0	0	1	3	1	2	1	59	1	61.25	48.1	145.4	1	6	1	0	0	0	0	0	15	2020-06-02	1154	38.4667	2023-07-31	0
2020040869	0	5.89	0	4.97895	1	0	71	1	0	0	0	0	0	1	3	1	0	0	119	0	46.6	41.1	176.6	0	4	1	0	0	1	1	0	17	2020-06-02	1154	38.4667	2023-07-31	0
2020041056	0	4.61	0	4.33623	0	1	78	1	1	0	1	1	0	1	1	0	0	0	81	0	47.1	41.1	208.9	0	3.66	0	0	0	0	0	0	10	2020-06-03	1153	38.4333	2023-07-31	0
2020041081	1	2.89	1	6.11765	1	0	69	0	0	0	0	0	0	1	1	0	0	0	49	1	60.85	42.7	136.9	1	3.66	0	0	0	0	0	0	14	2020-06-05	1151	38.3667	2023-07-31	0
2020041720	0	5.53	0	5.25606	1	0	78	1	1	0	1	1	0	2	3	1	1	1	88	0	48.35	41.3	213.6	0	4.33	1	1	1	1	0	0	30	2020-06-04	976	32.5333	2023-02-05	1
2020042032	0	4.01	0	3.17257	1	1	66	0	0	0	1	1	0	1	1	0	0	0	103	0	57.15	48.1	182	0	4.5	1	0	0	0	0	0	15	2020-06-05	1151	38.3667	2023-07-31	0
2020042107	0	3.87	0	2.81374	1	1	69	0	0	0	0	0	0	1	1	0	0	0	78	1	50.05	44.3	199.8	0	2.5	0	0	0	0	0	0	9	2020-06-05	1151	38.3667	2023-07-31	0
2020042418	0	8.05	0	4.25906	1	0	71	1	1	0	0	0	1	1	3	1	0	0	124	0	44.25	39	233.7	0	5.33	1	0	0	0	0	0	20	2020-06-06	868	28.9333	2022-10-22	1
2020042615	1	3.86	1	2.53177	1	0	79	1	0	0	0	0	1	2	3	1	1	1	98	0	51.2	43.4	149	1	2.5	0	0	0	0	0	0	8	2020-06-07	237	7.9	2021-01-30	1
2020043360	0	4.89	0	4.47405	1	0	87	1	0	0	1	1	0	2	2	0	0	0	83	0	46.9	42	191.8	0	2.5	0	1	0	0	0	0	16	2020-06-09	1147	38.2333	2023-07-31	0
2020044112	1	2.3	1	3.69995	1	1	71	1	0	0	1	1	0	0	2	0	0	0	79	1	52.1	40.1	165.5	0	4.5	1	1	0	0	1	0	14	2020-06-11	1087	36.2333	2023-06-03	1
2020044220	0	4.29	0	3.74222	1	1	67	0	0	0	0	0	0	1	3	1	1	1	103	0	41.95	38.8	123.2	1	2.67	0	1	0	0	0	0	9	2020-06-13	392	13.0667	2021-07-10	1
2020044232	1	3.51	1	6.04591	1	0	71	1	1	0	2	1	0	1	2	0	0	0	59	1	52.85	46.1	200.4	0	4	1	1	0	0	0	0	26	2020-06-11	1145	38.1667	2023-07-31	0
2020044260	0	4.61	0	4.54665	0	1	70	1	0	0	1	1	0	1	3	1	2	1	101	0	53.7	42.7	163	0	3.5	0	0	0	0	0	0	17	2020-06-11	1145	38.1667	2023-07-31	0
2020044612	0	6.77	0	4.54932	1	0	67	0	0	0	0	0	1	1	3	1	1	1	96	0	44	41.5	146.5	1	3.33	0	0	0	0	0	0	16	2020-06-12	1144	38.1333	2023-07-31	0
2020044900	0	5.06	0	3.49636	1	1	76	1	0	0	0	0	0	1	3	1	1	1	70	1	41.85	36.5	133.4	1	2.5	0	0	1	0	1	0	21	2020-06-14	1142	38.0667	2023-07-31	0
2020045096	0	8.36	0	4.65052	1	0	68	0	0	0	0	0	0	1	2	0	0	0	113	0	49.15	43.1	184.2	0	4	1	0	0	1	0	0	19	2020-06-15	1141	38.0333	2023-07-31	0
2020045101	1	4.19	1	4.04152	1	0	71	1	0	0	0	0	1	1	3	1	0	0	84	0	50.35	46.1	205	0	3	0	0	0	0	1	0	13	2020-06-15	923	30.7667	2022-12-25	1
2020045119	0	5.5	0	3.49303	1	1	70	1	0	0	0	0	0	0	3	1	1	1	95	0	51.6	44.8	177	0	4	1	0	0	0	0	0	18	2020-06-15	1007	33.5667	2023-03-19	1
2020045790	1	2.97	1	6.28897	1	0	76	1	0	0	1	1	0	1	3	1	0	0	54	1	45.05	40.1	219.9	0	4.5	1	0	0	0	0	0	21	2020-06-16	1140	38	2023-07-31	0
2020046303	0	4.8	0	7.80324	0	0	70	1	0	1	1	1	0	1	1	0	0	0	136	0	55.9	42.9	208.2	0	4.5	1	0	0	0	0	0	18	2020-06-18	1138	37.9333	2023-07-31	0
2020046365	0	5.87	0	3.68963	1	0	66	0	0	0	1	1	0	1	3	1	0	0	90	0	52.1	45	178.9	0	4.5	1	0	0	0	0	0	20	2020-06-18	1138	37.9333	2023-07-31	0
2020048320	1	3.93	1	4.32099	1	0	77	1	0	0	0	0	0	1	1	0	1	1	87	0	38.85	34.6	164.2	0	2.5	0	0	0	0	1	0	20	2020-06-25	918	30.6	2022-12-30	1
2020048548	1	4.22	1	3.12457	1	0	72	1	1	0	0	0	0	1	2	0	0	0	64	1	47.6	43.4	195.7	0	6.5	1	0	1	0	0	0	46	2020-06-26	1130	37.6667	2023-07-31	0
2020048849	0	6.21	0	5.80012	1	0	67	0	0	0	1	1	1	1	3	1	0	0	117	0	47	43.3	159.4	1	5.33	1	0	0	0	0	0	10	2020-06-27	1129	37.6333	2023-07-31	0
2020050052	0	3.99	0	4.14196	0	1	66	0	0	0	1	1	0	1	3	1	0	0	92	0	83.35	74.7	214.8	0	3	0	0	0	0	0	0	17	2020-06-30	657	21.9	2022-04-18	1
2020050186	0	7.66	0	6.15917	1	0	67	0	0	0	1	1	0	1	3	1	0	0	106	0	48.45	42.4	288.1	0	4	1	0	0	0	0	0	17	2020-06-30	1126	37.5333	2023-07-31	0
2020050359	0	6.16	0	4.85757	1	0	71	1	0	0	2	1	0	1	2	0	0	0	94	0	45.4	41.6	184.1	0	3.5	0	0	0	0	0	0	17	2020-07-01	1125	37.5	2023-07-31	0
2020051021	0	7.15	0	8.14062	0	0	67	0	0	0	0	0	0	0	1	0	0	0	86	0	52.95	46.9	225.8	0	2.5	0	1	1	1	0	0	54	2020-07-03	1123	37.4333	2023-07-31	0
2020052084	0	3.45	0	4.91541	0	1	67	0	0	1	1	1	0	1	2	0	2	1	89	0	55.25	47.5	212.3	0	3.66	0	0	0	0	0	0	17	2020-07-06	1120	37.3333	2023-07-31	0
2020052154	0	5.5	0	4.42965	0	1	66	0	0	0	2	1	0	1	3	1	2	1	164	0	56.25	46.3	212	0	4.5	1	0	0	0	0	0	18	2020-07-06	1062	35.4	2023-06-03	1
2020052270	1	2.98	1	3.29778	1	1	72	1	1	0	0	0	0	2	3	1	1	1	55	1	45.5	40.5	151.3	1	3	0	0	0	0	0	0	13	2020-07-06	774	25.8	2022-08-19	1
2020052390	0	3.27	0	2.57812	1	1	68	0	1	0	0	0	0	1	3	1	0	0	81	0	49.65	44.2	181.2	0	3.66	0	0	0	0	0	0	10	2020-07-07	1119	37.3	2023-07-31	0
2020052737	0	4.54	0	4.76768	1	0	66	0	0	0	0	0	0	0	3	1	1	1	87	0	47.4	41.9	222.8	0	3.5	0	0	0	0	0	0	17	2020-07-08	861	28.7	2022-11-16	1
2020052744	0	5.3	0	3.57239	1	1	67	0	0	1	1	1	0	1	1	0	0	0	100	0	53.5	46.9	226.7	0	3	0	0	0	0	0	0	20	2020-07-08	1118	37.2667	2023-07-31	0
2020053087	0	7.95	0	3.78395	1	0	67	0	0	0	0	0	1	1	3	1	1	1	110	0	54.65	45.8	217.6	0	4.67	1	0	0	0	0	0	12	2020-07-09	1117	37.2333	2023-07-31	0
2020053399	0	4.67	0	6.91837	0	0	67	0	0	0	2	1	0	1	3	1	0	0	71	1	50.3	43.8	274.7	0	4.67	1	0	0	0	0	0	14	2020-07-09	1117	37.2333	2023-07-31	0
2020054668	0	5.63	0	4.6596	0	1	71	1	0	0	0	0	0	0	3	1	0	0	84	0	48.85	41.9	188.9	0	3	0	0	0	0	0	0	20	2020-07-13	1113	37.1	2023-07-31	0
2020054726	1	3.18	1	3.85156	1	1	78	1	1	1	0	0	0	2	3	1	0	0	90	0	47.5	41.8	185.3	0	3.5	0	0	0	0	0	0	18	2020-07-13	1113	37.1	2023-07-31	0
2020055392	0	5.16	0	7.36573	0	0	77	1	0	0	0	0	1	1	3	1	2	1	126	0	41.35	33.2	147.9	1	4.67	1	0	0	0	0	0	12	2020-07-15	777	25.9	2022-08-31	1
2020055432	1	3.96	1	3.45329	1	0	66	0	0	0	0	0	1	1	2	0	1	1	101	0	51.35	46.2	193	0	4.67	1	0	0	0	1	0	13	2020-07-15	1111	37.0333	2023-07-31	0
2020055970	0	6.29	0	5.76663	1	0	65	0	0	1	1	1	1	2	1	0	0	0	82	0	47.05	36.8	246.2	0	3	0	1	0	0	1	0	17	2020-07-16	1110	37	2023-07-31	0
2020056729	0	6.93	0	4.80322	1	0	75	1	0	1	1	1	0	1	1	0	0	0	102	0	53	45.7	225.2	0	5	1	0	0	0	0	0	22	2020-07-19	1107	36.9	2023-07-31	0
2020057133	0	3.47	0	4.23769	0	1	65	0	0	0	0	0	0	1	3	1	0	0	72	1	57.7	44.7	197.1	0	3	0	0	0	0	0	0	16	2020-07-20	1106	36.8667	2023-07-31	0
2020057968	1	4.11	1	3.67829	1	0	78	1	0	0	1	1	0	1	3	1	2	1	100	0	46.4	39.1	230.5	0	2.67	0	0	0	0	0	0	20	2020-07-22	1032	34.4	2023-05-20	1
2020058288	0	7.84	0	4.39453	1	0	70	1	0	0	1	1	0	0	2	0	2	1	103	0	52.6	38.5	153.7	1	6.33	1	0	0	1	0	0	16	2020-07-22	903	30.1	2023-01-11	1
2020058294	0	4.87	0	4.24672	1	0	66	0	0	0	1	1	0	0	3	1	1	1	88	0	50.75	43.3	220.9	0	3	0	0	0	0	0	0	16	2020-07-22	1104	36.8	2023-07-31	0
2020058515	0	4.93	0	3.54688	1	1	65	0	1	0	1	1	0	1	3	1	0	0	89	0	49.6	42.7	155.8	1	3	0	0	0	0	0	0	12	2020-07-23	688	22.9333	2022-06-11	1
2020058520	0	8.83	0	4.31244	1	0	71	1	0	0	1	1	0	2	3	1	0	0	124	0	52.4	43.8	189.1	0	5	1	0	0	0	0	0	22	2020-07-23	1103	36.7667	2023-07-31	0
2020058557	0	5.26	0	5.45675	1	0	67	0	0	0	0	0	0	1	1	0	0	0	72	1	51.15	46.3	258.7	0	3	0	0	0	0	1	0	16	2020-07-23	1103	36.7667	2023-07-31	0
2020058849	0	6.44	0	3.24838	1	0	71	1	0	0	0	0	0	1	3	1	1	1	94	0	37.6	33.6	169.3	0	2.5	0	0	0	0	0	0	23	2020-07-24	1102	36.7333	2023-07-31	0
2020058851	0	6.12	0	7.681	0	0	70	1	1	0	0	0	1	2	3	1	1	1	115	0	41.15	35.4	163.6	0	5.5	1	0	0	0	0	0	17	2020-07-27	1099	36.6333	2023-07-31	0
2020059833	0	3.26	1	8.25781	0	0	72	1	0	0	0	0	1	0	3	1	2	1	76	1	49.05	42.1	184.7	0	3	0	0	0	0	0	0	14	2020-07-27	762	25.4	2022-08-28	1
2020060500	0	4.03	0	3.35306	1	1	70	1	0	0	0	0	0	1	3	1	2	1	81	0	52.65	46.1	179.8	0	5	1	0	0	0	0	0	13	2020-07-28	1098	36.6	2023-07-31	0
2020060842	1	3.35	1	6.07408	1	0	65	0	0	0	0	0	1	1	3	1	1	1	60	1	57.55	49.8	175.1	0	3.66	0	1	0	0	0	0	13	2020-07-29	858	28.6	2022-12-04	1
2020060858	0	5.93	0	4.65744	1	0	68	0	0	0	0	0	0	1	2	0	0	0	119	0	54.4	44.5	209.3	0	3	0	0	0	0	0	0	10	2020-07-29	1097	36.5667	2023-07-31	0
2020061231	1	2.45	1	4.55086	1	0	70	1	0	0	0	0	0	2	1	0	1	1	59	1	45.45	40.9	182.2	0	4.33	1	1	0	0	0	0	13	2020-07-30	713	23.7667	2022-07-13	1
2020061504	1	2.96	1	4.75298	1	0	65	0	0	0	0	0	1	1	2	0	0	0	97	0	43.2	38.7	144.9	1	3.5	0	0	0	0	0	0	11	2020-07-31	1095	36.5	2023-07-31	0
2020061568	0	3.85	0	2.86421	1	1	76	1	0	0	0	0	0	1	1	0	0	0	92	0	59.6	51.6	198.1	0	4	1	0	0	0	0	0	12	2020-07-31	1095	36.5	2023-07-31	0
2020062259	0	4.73	0	5.43985	1	0	77	1	1	0	0	0	1	1	3	1	1	1	95	0	46.5	41.3	197.6	0	5	1	0	0	0	0	0	16	2020-08-03	538	17.9333	2022-01-23	1
2020063398	0	3.26	0	2.39224	1	1	75	1	0	0	1	1	0	1	2	0	2	1	81	0	49.85	40.5	169.3	0	2.67	0	0	0	0	0	0	14	2020-08-05	672	22.4	2022-06-08	1
2020063724	0	3.73	1	6.9161	0	0	76	1	0	0	1	1	0	1	1	0	0	0	70	1	51.15	45.3	197.5	0	5.33	1	1	0	0	0	0	16	2020-08-06	262	8.73333	2021-04-25	1
2020064227	1	3.97	1	4.2714	1	0	78	1	0	0	0	0	0	1	2	0	1	1	73	1	48	42.1	169.8	0	3	0	1	1	1	1	0	31	2020-08-08	1017	33.9	2023-05-22	1
2020064258	0	4.62	0	4.00796	0	1	66	0	0	1	0	0	0	1	1	0	0	0	76	1	45.45	39.8	179.8	0	2.5	0	0	0	0	0	0	17	2020-08-07	1088	36.2667	2023-07-31	0
2020064519	0	4.31	0	4.73673	0	1	75	1	1	0	1	1	0	2	3	1	1	1	84	0	54.75	45.2	202.2	0	3	0	0	0	0	0	0	12	2020-08-08	1071	35.7	2023-07-15	1
2020065635	0	4.2	1	7.83822	0	0	74	1	1	0	0	0	1	1	3	1	1	1	93	0	47.5	37.6	149.6	1	4	1	0	0	0	1	0	20	2020-08-11	662	22.0667	2022-06-04	1
2020065814	1	3.8	1	5.14187	1	0	75	1	0	0	0	0	1	0	3	1	2	1	92	0	52.4	40.9	167.5	0	3.5	0	1	0	0	0	0	19	2020-08-11	822	27.4	2022-11-11	1
2020066621	0	6.04	0	4.89636	1	0	67	0	0	0	0	0	0	0	3	1	0	0	81	0	61.75	49.2	189.6	0	5.67	1	0	0	0	0	0	13	2020-08-13	1082	36.0667	2023-07-31	0
2020066829	0	4.89	0	3.9902	1	0	72	1	0	0	0	0	1	2	3	1	0	0	84	0	50.2	43	183.9	0	6.5	1	1	1	0	1	0	67	2020-08-14	674	22.4667	2022-06-19	1
2020066922	0	4.7	0	3.90448	1	1	65	0	0	0	0	0	0	1	2	0	0	0	99	0	52.5	43.6	130.1	1	2.67	0	0	0	0	0	0	15	2020-08-14	1081	36.0333	2023-07-31	0
2020067027	0	4.62	0	6.53811	0	0	73	1	0	0	0	0	1	1	2	0	0	0	71	1	47.25	41.3	172.1	0	4.33	1	0	0	0	0	0	14	2020-08-14	386	12.8667	2021-09-04	1
2020067607	0	6.13	0	5.75941	1	0	77	1	0	0	1	1	0	2	1	0	0	0	139	0	49.95	45.1	196.6	0	3	0	1	0	0	1	0	19	2020-08-17	1078	35.9333	2023-07-31	0
2020067730	1	3.6	1	2.53287	1	0	77	1	0	0	0	0	1	1	3	1	0	0	52	1	44.6	41.1	141.9	1	4.33	1	0	0	0	0	0	10	2020-08-17	1078	35.9333	2023-07-31	0
2020067775	0	6.38	0	3.72664	1	0	66	0	0	0	0	0	0	2	3	1	1	1	89	0	45.25	40.6	152.5	1	3.5	0	0	0	0	1	0	15	2020-08-17	1078	35.9333	2023-07-31	0
2020067897	1	2.97	1	3.18835	1	1	71	1	0	0	0	0	0	0	1	0	0	0	96	0	53.65	46.1	193.3	0	3	0	0	0	0	0	0	13	2020-08-17	1078	35.9333	2023-07-31	0
2020068217	0	5.88	0	5.81847	1	0	72	1	0	0	0	0	0	0	2	0	0	0	84	0	51.2	43.9	185.8	0	3	0	0	0	0	0	0	11	2020-08-18	1077	35.9	2023-07-31	0
2020068921	1	2.43	1	4.02997	1	0	69	0	0	1	0	0	1	1	2	0	0	0	75	1	50.2	39.4	188.3	0	5	1	1	0	0	0	0	21	2020-08-19	976	32.5333	2023-04-22	1
2020070085	1	2.72	1	3.66584	1	0	67	0	0	0	0	0	1	1	3	1	1	1	46	1	46.1	36.6	213.4	0	5.5	1	1	0	1	0	0	15	2020-08-23	1072	35.7333	2023-07-31	0
2020070867	0	7.78	0	4.51074	1	0	76	1	1	1	0	0	0	1	1	0	0	0	125	0	49	42.4	202.9	0	2.67	0	0	0	0	0	0	16	2020-08-25	1070	35.6667	2023-07-31	0
2020070874	0	7.52	0	4.9313	1	0	72	1	0	0	0	0	0	1	2	0	2	1	124	0	62.7	52.4	253.6	0	7.5	1	1	0	0	0	0	17	2020-08-25	928	30.9333	2023-03-11	1
2020071671	1	3.19	1	2.12853	1	1	72	1	0	0	0	0	0	1	3	1	1	1	88	0	50.05	43.6	178.2	0	3	0	0	0	0	0	0	14	2020-08-27	1068	35.6	2023-07-31	0
2020071680	1	3.11	1	2.73226	1	1	67	0	0	0	0	0	0	1	3	1	0	0	84	0	51.2	42	168.3	0	3.5	0	0	0	0	0	0	12	2020-08-27	1068	35.6	2023-07-31	0
2020072032	1	3.34	1	3.65234	1	0	75	1	1	0	0	0	0	1	3	1	0	0	94	0	55.6	43.8	197.1	0	2.5	0	0	0	0	0	0	24	2020-08-28	1067	35.5667	2023-07-31	0
2020072071	0	5.43	0	3.89546	1	1	69	0	0	0	0	0	0	1	3	1	0	0	119	0	56.6	49.3	199.4	0	6	1	0	0	0	1	0	10	2020-08-28	1067	35.5667	2023-07-31	0
2020072643	1	3.57	1	3.22498	1	0	66	0	0	0	0	0	1	1	3	1	0	0	135	0	53.35	42.9	182	0	4.5	1	1	0	0	0	0	19	2020-08-30	765	25.5	2022-10-04	1
2020072957	0	5.73	0	6.13841	1	0	68	0	0	0	0	0	0	2	3	1	1	1	94	0	48.45	42.1	233.7	0	3.66	0	0	0	0	0	0	12	2020-08-31	1064	35.4667	2023-07-31	0
2020073467	1	3.29	1	6.04844	1	0	67	0	0	0	0	0	1	1	1	0	0	0	76	1	57.35	52	273.2	0	5	1	0	0	0	0	0	12	2020-09-01	1063	35.4333	2023-07-31	0
2020074018	0	4.94	0	5.0225	1	0	70	1	0	0	0	0	1	1	1	0	0	0	108	0	64	43.8	218.6	0	3.66	0	1	1	0	1	0	48	2020-09-02	1062	35.4	2023-07-31	0
2020074178	0	6.03	0	6.391	0	0	79	1	0	0	0	0	1	1	3	1	1	1	85	0	51.7	42.9	211.6	0	4	1	1	0	0	0	0	18	2020-09-03	1061	35.3667	2023-07-31	0
2020074775	0	9.35	0	6.07049	1	0	66	0	0	0	1	1	0	1	3	1	0	0	95	0	52.65	45.4	185	0	3	0	0	0	0	0	0	19	2020-09-04	977	32.5667	2023-07-31	1
2020074825	1	2.79	1	2.5721	1	1	79	1	1	0	0	0	1	1	3	1	0	0	65	1	49.75	41.7	152.4	1	4.5	1	0	0	0	0	0	23	2020-09-04	407	13.5667	2021-10-16	1
2020074873	0	7.64	0	3.39543	1	0	66	0	1	0	0	0	0	1	3	1	0	0	100	0	42.2	38.5	159.5	1	4.5	1	0	0	0	0	0	13	2020-09-04	1060	35.3333	2023-07-31	0
2020076163	0	6.07	0	5.59006	1	0	65	0	0	0	0	0	1	2	3	1	2	1	128	0	48.35	41.8	199.3	0	4	1	0	0	0	0	0	12	2020-09-08	1056	35.2	2023-07-31	0
2020076227	0	4.05	0	5.3501	0	1	73	1	0	0	1	1	0	1	3	1	0	0	55	1	51.55	42.6	157.9	1	4	1	1	0	0	1	0	14	2020-09-08	1056	35.2	2023-07-31	0
2020076285	1	2.96	1	2.57232	1	1	75	1	0	0	0	0	0	1	2	0	0	0	85	0	48.9	43.4	184	0	4	1	0	0	0	1	0	15	2020-09-08	1056	35.2	2023-07-31	0
2020076883	0	9.58	0	6.02076	1	0	75	1	0	0	0	0	0	2	2	0	0	0	118	0	51.1	43.4	174	0	2.67	0	0	0	0	0	0	13	2020-09-10	1054	35.1333	2023-07-31	0
2020077279	0	4.41	0	6.16372	1	0	66	0	0	0	0	0	0	0	2	0	1	1	97	0	53.05	49.7	223.8	0	3.33	0	0	0	0	0	0	12	2020-09-11	1053	35.1	2023-07-31	0
2020077673	0	4.24	0	4.76108	0	1	70	1	0	0	0	0	1	0	2	0	0	0	87	0	51.85	44.6	185.1	0	5.5	1	0	0	0	0	0	18	2020-09-12	1052	35.0667	2023-07-31	0
2020078548	0	4.5	0	3.39556	1	1	71	1	1	0	0	0	0	2	3	1	0	0	103	0	50.5	41.7	162.3	0	4.5	1	0	0	0	0	0	16	2020-09-14	1050	35	2023-07-31	0
2020078771	0	5.1	0	5.41074	1	0	69	0	1	0	0	0	0	1	3	1	3	1	100	0	49.6	39.6	220.3	0	3	0	0	0	0	0	0	21	2020-09-15	1049	34.9667	2023-07-31	0
2020079214	0	2.83	1	4.9282	0	1	66	0	0	0	0	0	0	1	3	1	2	1	75	1	48.6	43.7	190.6	0	6.33	1	0	0	0	0	0	13	2020-09-17	1047	34.9	2023-07-31	0
2020080093	0	6.6	0	6.27366	1	0	68	0	0	1	2	1	0	1	1	0	0	0	95	0	52.3	45.7	229.3	0	3	0	0	0	0	0	0	11	2020-09-18	1046	34.8667	2023-07-31	0
2020080124	0	3.76	0	3.89062	1	1	65	0	0	0	1	1	0	1	1	0	1	1	77	1	49.05	43	179.9	0	3	0	0	0	0	0	0	12	2020-09-18	1046	34.8667	2023-07-31	0
2020080371	0	5.27	0	3.42144	1	1	70	1	0	0	0	0	0	1	3	1	0	0	70	1	59.3	51.4	223.4	0	2.67	0	1	0	0	1	0	16	2020-09-19	1045	34.8333	2023-07-31	0
2020081004	0	3.91	0	5.375	0	1	71	1	1	0	0	0	0	1	3	1	0	0	71	1	48.15	44.3	196.2	0	3	0	0	0	0	0	0	21	2020-09-21	1043	34.7667	2023-07-31	0
2020081541	0	5.06	0	6.39347	0	0	78	1	1	0	0	0	0	2	1	0	1	1	88	0	49.5	41.9	178.9	0	3.33	0	0	0	0	0	0	18	2020-09-22	860	28.6667	2023-01-30	1
2020081557	0	4.39	0	4.09236	0	1	79	1	1	0	0	0	0	1	3	1	0	0	88	0	43	36.2	162.3	0	4.33	1	0	0	0	0	0	12	2020-09-22	975	32.5	2023-05-25	1
2020081863	1	4.38	1	4.69173	1	0	74	1	1	1	1	1	1	1	1	0	1	1	77	1	47.75	42.5	166.5	0	5	1	1	0	1	0	0	18	2020-09-23	921	30.7	2023-04-02	1
2020082544	0	5.4	0	5.71626	1	0	76	1	0	0	0	0	1	2	2	0	3	1	103	0	52.25	45	268.3	0	7	1	0	0	0	0	0	11	2020-09-25	972	32.4	2023-05-25	1
2020083377	0	4.27	0	3.70806	1	1	65	0	0	0	0	0	0	1	2	0	2	1	72	1	53.6	45.8	218.9	0	4.5	1	1	0	0	0	0	20	2020-09-28	234	7.8	2021-05-20	1
2020083560	1	4	1	5.38408	1	0	74	1	1	0	0	0	0	2	2	0	2	1	90	0	45.4	40.1	215.1	0	4	1	1	0	0	0	0	18	2020-09-28	1036	34.5333	2023-07-31	0
2020083859	0	3.31	0	2.64	1	1	78	1	0	1	0	0	0	1	3	1	1	1	81	0	59.35	49.8	227.4	0	7	1	1	0	0	0	0	15	2020-09-29	520	17.3333	2022-03-03	1
2020084078	0	4.29	0	5.28616	0	1	74	1	0	0	1	1	0	0	2	0	0	0	108	0	56.15	48.6	198.1	0	3	0	0	0	0	0	0	14	2020-09-30	1034	34.4667	2023-07-31	0
2020084166	0	5.29	0	6.72318	0	0	68	0	0	0	1	1	0	1	2	0	0	0	76	1	46.45	38.3	212.4	0	3	0	0	0	0	0	0	12	2020-10-05	1029	34.3	2023-07-31	0
2020084720	1	4.07	1	2.65723	1	0	65	0	0	0	0	0	0	1	3	1	3	1	99	0	43.3	39.1	151.6	1	5	1	1	0	0	1	0	20	2020-10-03	303	10.1	2021-08-02	1
2020084771	0	5.18	0	5.52	0	1	68	0	0	0	0	0	0	0	3	1	0	0	111	0	48.4	39	143.7	1	5.67	1	0	0	0	0	0	15	2020-10-03	1031	34.3667	2023-07-31	0
2020085178	0	3.23	0	4.05696	0	1	75	1	1	0	1	1	0	1	3	1	0	0	57	1	44.1	38.5	189	0	4.5	1	0	0	0	0	0	22	2020-10-05	319	10.6333	2021-08-20	1
2020085295	0	8.33	0	3.39073	1	0	72	1	0	0	1	1	0	1	2	0	2	1	112	0	46.9	40.2	184.1	0	3	0	0	0	0	0	0	12	2020-10-05	1029	34.3	2023-07-31	0
2020085341	0	5.23	0	9.20836	0	0	72	1	0	0	1	1	1	1	1	0	0	0	90	0	49.65	39.6	178.3	0	7.33	1	0	0	0	1	0	15	2020-10-05	1029	34.3	2023-07-31	0
2020085626	1	1.9	1	2.14447	1	1	68	0	0	0	2	1	0	1	1	0	0	0	68	1	56.1	48.4	196.2	0	4.5	1	0	0	0	0	0	13	2020-10-06	996	33.2	2023-06-29	1
2020087056	0	3.61	0	3.43524	1	1	72	1	0	0	0	0	0	1	3	1	0	0	88	0	53.2	42.2	206.6	0	3	0	0	0	0	0	0	16	2020-10-09	863	28.7667	2023-02-19	1
2020087166	0	5.36	0	3.19688	1	1	72	1	1	0	1	1	0	0	3	1	0	0	96	0	53.65	42.7	181.6	0	3.66	0	0	0	0	0	0	22	2020-10-11	711	23.7	2022-09-22	1
2020087363	0	3.74	0	3.39646	1	1	76	1	0	0	1	1	0	1	1	0	0	0	64	1	48.95	41.2	172.3	0	2.67	0	0	0	0	0	0	12	2020-10-10	1024	34.1333	2023-07-31	0
2020087386	0	7.94	0	4.7479	1	0	70	1	1	0	1	1	0	1	2	0	1	1	114	0	51.15	42	185.5	0	4.67	1	0	0	0	0	0	14	2020-10-10	818	27.2667	2023-01-06	1
2020087787	0	5.05	0	4.45546	1	0	67	0	1	0	0	0	1	1	1	0	0	0	74	1	49.85	44.3	224.9	0	3	0	0	0	0	0	0	26	2020-10-12	1022	34.0667	2023-07-31	0
2020088143	0	5.35	0	5.28628	1	0	67	0	0	0	1	1	0	1	1	0	0	0	115	0	48.3	43.2	208.4	0	4.5	1	0	0	0	0	0	15	2020-10-12	1022	34.0667	2023-07-31	0
2020088207	0	6.97	0	4.97177	1	0	67	0	1	0	1	1	0	1	2	0	0	0	80	0	46.25	40	152	1	3.5	0	0	0	0	0	0	31	2020-10-12	1022	34.0667	2023-07-31	0
2020088241	0	5.47	0	5.35425	1	0	69	0	0	0	0	0	1	1	3	1	0	0	82	0	51.1	43.6	232.3	0	3.66	0	0	0	0	0	0	17	2020-10-12	1022	34.0667	2023-07-31	0
2020088757	0	6.48	0	5.21399	1	0	77	1	1	0	0	0	0	1	3	1	1	1	107	0	47.8	40.3	171.3	0	4	1	1	0	1	1	0	29	2020-10-13	396	13.2	2021-11-13	1
2020088955	0	7.02	0	4.39062	1	0	67	0	0	0	1	1	1	2	1	0	0	0	99	0	51.6	43.9	210	0	3.33	0	0	0	0	0	0	13	2020-10-14	1020	34	2023-07-31	0
2020090179	0	6.79	0	5.89164	0	1	68	0	1	1	1	1	0	1	3	1	1	1	98	0	54.9	43.7	190.3	0	4.5	1	0	0	0	0	0	22	2020-10-17	1017	33.9	2023-07-31	0
2020090638	0	3.68	0	4.94561	0	1	70	1	0	0	0	0	0	1	2	0	1	1	77	1	55.95	46.8	165.3	0	4.5	1	1	0	0	0	0	14	2020-10-19	1015	33.8333	2023-07-31	0
2020090650	0	5.91	0	4.14769	1	0	74	1	1	0	0	0	1	1	3	1	2	1	106	0	50	46.7	162.9	0	3.5	0	0	0	0	0	0	17	2020-10-19	1015	33.8333	2023-07-31	0
2020090920	0	6.08	0	5.70934	1	0	69	0	0	0	1	1	0	1	1	0	1	1	86	0	51.45	44.8	238.3	0	3.5	0	0	0	1	1	0	18	2020-10-19	1015	33.8333	2023-07-31	0
2020091042	1	2.81	1	3.25055	1	1	68	0	0	0	0	0	0	1	3	1	0	0	62	1	52.65	43.1	196	0	4	1	0	0	0	0	0	14	2020-10-19	1015	33.8333	2023-07-31	0
2020091442	0	8.31	0	5.7328	1	0	68	0	0	0	2	1	1	1	1	0	1	1	88	0	49.2	42.5	254.6	0	3.5	0	0	0	0	0	0	17	2020-10-20	1014	33.8	2023-07-31	0
2020092722	0	7.52	0	7.53906	0	0	65	0	0	0	2	1	0	1	1	0	0	0	83	0	51.05	42.6	209.9	0	4.5	1	0	0	0	0	0	16	2020-10-24	1010	33.6667	2023-07-31	0
2020093163	1	4.35	1	5.5427	1	0	68	0	0	0	0	0	0	1	3	1	1	1	98	0	43.85	39.6	170.2	0	5	1	0	0	0	0	0	14	2020-10-26	1008	33.6	2023-07-31	0
2020093448	0	5.82	0	3.65533	1	1	66	0	0	0	0	0	1	1	1	0	0	0	97	0	58.95	46.7	169.8	0	3	0	0	0	0	0	0	21	2020-10-26	1008	33.6	2023-07-31	0
2020093453	0	3.48	0	2.8306	1	1	69	0	0	1	1	1	0	1	3	1	1	1	62	1	55.2	46.4	199.7	0	3	0	0	0	0	0	0	15	2020-10-26	858	28.6	2023-03-03	1
2020093590	0	8.83	0	4.73683	1	0	69	0	1	0	0	0	0	1	2	0	0	0	83	0	51.25	46.3	208.2	0	3.5	0	0	0	0	0	0	16	2020-10-26	1008	33.6	2023-07-31	0
2020094150	1	3.2	1	5.35602	1	0	77	1	0	0	0	0	1	2	3	1	0	0	50	1	54.8	45.1	202.7	0	4.33	1	0	0	0	0	0	14	2020-10-28	1006	33.5333	2023-07-31	0
2020094394	0	7.64	0	5.30016	1	0	65	0	1	1	0	0	0	1	2	0	1	1	98	0	52.65	46.2	241	0	4.5	1	0	0	0	0	0	14	2020-10-28	1006	33.5333	2023-07-31	0
2020094511	0	6.4	0	5.84757	1	0	68	0	0	0	0	0	1	2	1	0	0	0	106	0	48.4	43.8	192.9	0	3.5	0	0	0	0	0	0	20	2020-10-29	970	32.3333	2023-06-26	1
2020095458	0	4.6	0	4.93772	1	0	68	0	0	0	0	0	1	2	3	1	3	1	113	0	51.55	44.3	217.2	0	4.33	1	0	0	0	1	0	12	2020-11-01	474	15.8	2022-02-18	1
2020095649	1	4.1	1	6.10102	1	0	73	1	1	0	0	0	0	2	3	1	1	1	110	0	48.9	44.4	144.2	1	4.33	1	0	0	0	0	0	15	2020-11-02	1001	33.3667	2023-07-31	0
2020095671	0	6.39	0	5.46523	1	0	67	0	0	1	0	0	1	2	3	1	0	0	109	0	47.2	41.8	147.3	1	3.33	0	0	0	0	0	0	20	2020-11-02	1001	33.3667	2023-07-31	0
2020095770	0	6.2	0	4.45179	0	1	65	0	0	1	1	1	0	1	1	0	0	0	88	0	56.4	47.9	205.8	0	3.5	0	0	0	0	0	0	17	2020-11-02	1001	33.3667	2023-07-31	0
2020096242	0	9.05	0	5.89215	1	0	70	1	0	0	2	1	0	0	1	0	0	0	108	0	53.5	45.5	241	0	3.33	0	0	0	0	0	0	15	2020-11-03	1000	33.3333	2023-07-31	0
2020096840	0	6.69	0	5.33218	1	0	70	1	1	0	0	0	0	1	3	1	0	0	99	0	48.85	41.5	180.1	0	2.67	0	0	0	0	0	0	13	2020-11-04	999	33.3	2023-07-31	0
2020096866	0	6.52	0	5.60514	1	0	69	0	1	0	0	0	0	0	3	1	0	0	95	0	41.55	33.4	220.4	0	3.5	0	0	0	1	0	0	20	2020-11-04	707	23.5667	2022-10-12	1
2020097448	1	3.95	1	4.39234	1	0	74	1	1	0	0	0	0	1	3	1	0	0	99	0	56.95	48.2	227.7	0	3	0	0	1	0	0	0	25	2020-11-06	879	29.3	2023-04-04	1
2020097457	0	7.29	0	7.42985	0	0	67	0	0	0	0	0	0	1	3	1	1	1	93	0	57.55	44.8	228.4	0	3	0	0	0	0	0	0	14	2020-11-06	997	33.2333	2023-07-31	0
2020097542	0	5.55	0	6.52342	0	0	67	0	0	0	0	0	1	0	3	1	0	0	114	0	52.3	43.6	213.1	0	3	0	1	0	0	0	0	19	2020-11-06	972	32.4	2023-07-06	1
2020097593	0	6.06	0	7.28244	0	0	69	0	1	1	1	1	0	1	1	0	0	0	95	0	55.35	45.6	280.7	0	4	1	0	0	0	0	0	15	2020-11-06	997	33.2333	2023-07-31	0
2020098095	0	7.45	0	6.15225	1	0	66	0	0	0	1	1	0	1	3	1	1	1	96	0	48	41	191.5	0	4.5	1	0	0	0	0	0	15	2020-11-08	995	33.1667	2023-07-31	0
2020099742	0	4.04	1	6.4573	0	0	68	0	0	0	0	0	0	1	3	1	2	1	106	0	57.15	48.3	263.6	0	2.67	0	0	0	0	0	0	12	2020-11-12	797	26.5667	2023-01-18	1
2020101074	0	6.37	0	7.19639	0	0	66	0	1	0	1	1	0	1	1	0	0	0	96	0	52.3	44.7	231.5	0	3.5	0	0	0	0	1	0	15	2020-11-16	987	32.9	2023-07-31	0
2020101351	0	3.82	1	7.05782	0	0	65	0	0	0	0	0	1	0	3	1	0	0	83	0	54.15	46.8	258.6	0	3.33	0	0	0	0	0	0	12	2020-11-17	907	30.2333	2023-05-13	1
2020101487	0	7.3	0	4.93426	1	0	66	0	0	0	0	0	0	1	3	1	0	0	124	0	55.55	50.6	277.9	0	3	0	0	0	1	1	0	17	2020-11-17	986	32.8667	2023-07-31	0
2020101824	1	4.22	1	4.93519	1	0	68	0	0	0	1	1	1	1	3	1	1	1	115	0	50.65	40.7	199.5	0	5.5	1	1	0	0	1	0	15	2020-11-18	985	32.8333	2023-07-31	0
2020102139	1	3.11	1	4.34382	1	0	84	1	1	0	0	0	0	1	3	1	2	1	59	1	45.5	39.5	169.9	0	4	1	1	0	0	1	0	21	2020-11-18	609	20.3	2022-07-20	1
2020102316	0	6.61	0	4.30485	1	0	68	0	1	0	0	0	1	1	3	1	0	0	105	0	44.95	37.6	141.3	1	3	0	0	0	0	0	0	26	2020-11-19	984	32.8	2023-07-31	0
2020102651	0	3.78	0	5.02344	0	1	68	0	1	0	0	0	0	1	3	1	3	1	89	0	49.25	44.6	199.4	0	2.5	0	0	0	0	0	0	15	2020-11-21	982	32.7333	2023-07-31	0
2020103672	0	5.31	0	5.47405	1	0	71	1	0	0	0	0	0	1	2	0	0	0	66	1	46	37.8	184.4	0	4.5	1	0	0	0	0	0	13	2020-11-24	979	32.6333	2023-07-31	0
2020104219	1	4.15	1	5.78612	1	0	71	1	0	0	1	1	1	2	3	1	0	0	88	0	48.2	41.4	241.9	0	4.33	1	0	0	0	0	0	17	2020-11-25	647	21.5667	2022-09-03	1
2020104232	0	3.69	0	3.95312	0	1	74	1	1	0	0	0	0	1	1	0	0	0	102	0	52.75	45	207.9	0	2.5	0	0	0	0	0	0	12	2020-11-25	978	32.6	2023-07-31	0
2020104293	0	6.36	0	6.35813	1	0	65	0	0	0	0	0	1	1	1	0	1	1	136	0	49.4	44.2	210.5	0	5	1	0	0	0	0	0	13	2020-11-26	977	32.5667	2023-07-31	0
2020105614	0	3.96	1	6.45546	0	0	66	0	0	0	2	1	0	0	1	0	0	0	89	0	49.45	43.2	183.4	0	2.67	0	0	0	0	0	0	13	2020-11-30	877	29.2333	2023-04-26	1
2020105979	1	3.89	1	3.07878	1	0	76	1	0	1	0	0	0	1	3	1	3	1	104	0	49.65	42.1	190.6	0	4.33	1	0	0	1	0	0	15	2020-12-01	741	24.7	2022-12-12	1
2020106147	0	4.27	0	3.6391	1	1	66	0	0	0	1	1	0	1	2	0	0	0	77	1	44.2	37.5	174.9	0	2.5	0	0	0	0	1	0	15	2020-12-01	972	32.4	2023-07-31	0
2020106175	0	6.11	0	4.96612	1	0	69	0	1	0	0	0	0	0	3	1	0	0	95	0	45.7	36.9	169	0	2.5	0	1	0	0	1	0	16	2020-12-01	972	32.4	2023-07-31	0
2020106508	1	3.17	1	2.62012	1	1	67	0	1	0	2	1	0	1	2	0	0	0	84	0	52.55	45.2	208.7	0	3	0	0	0	0	0	0	11	2020-12-02	879	29.3	2023-04-30	1
2020106538	0	5.21	0	5.94531	0	1	75	1	0	0	0	0	0	1	1	0	0	0	57	1	48.55	40.3	215.9	0	3.5	0	0	0	0	0	0	16	2020-12-02	971	32.3667	2023-07-31	0
2020106731	0	9.13	0	7.82406	0	0	66	0	1	0	1	1	0	1	1	0	0	0	114	0	57.8	48.9	243.2	0	3	0	0	0	0	0	0	12	2020-12-02	971	32.3667	2023-07-31	0
2020107143	0	5.5	0	7.59596	0	0	70	1	1	0	1	1	0	2	1	0	0	0	72	1	56.05	43.8	189.8	0	3.5	0	1	0	1	0	0	12	2020-12-03	970	32.3333	2023-07-31	0
2020107600	0	6.43	0	3.98597	1	0	66	0	1	0	0	0	1	0	1	0	0	0	96	0	53.25	48.7	256.4	0	3.33	0	0	0	0	0	0	16	2020-12-05	968	32.2667	2023-07-31	0
2020108441	0	7.19	0	5.75209	1	0	65	0	1	0	0	0	0	1	1	0	0	0	130	0	48.65	41.7	234.2	0	3	0	0	0	0	0	0	16	2020-12-07	966	32.2	2023-07-31	0
2020109139	0	3.2	1	5.25148	0	1	71	1	1	0	0	0	1	1	2	0	1	1	78	1	49	41	171.6	0	5	1	0	0	0	0	0	13	2020-12-09	964	32.1333	2023-07-31	0
2020109192	0	5.81	0	7.48617	0	0	72	1	0	0	1	1	1	1	3	1	0	0	81	0	47.3	41.9	210.4	0	4.33	1	1	0	0	0	0	16	2020-12-09	964	32.1333	2023-07-31	0
2020109991	0	5.48	0	7.0692	0	0	68	0	0	0	0	0	0	2	1	0	0	0	65	1	47.65	44.6	271.2	0	4	1	0	0	0	0	0	14	2020-12-11	962	32.0667	2023-07-31	0
2020110546	1	2.91	1	3.21767	1	0	67	0	0	0	0	0	1	1	3	1	0	0	50	1	49.1	41.7	186.4	0	5	1	1	0	0	0	0	18	2020-12-15	958	31.9333	2023-07-31	0
2020110593	0	4.57	0	3.54667	1	1	72	1	1	0	2	1	1	1	3	1	0	0	81	0	49.7	39.7	175.7	0	4	1	1	0	0	1	0	18	2020-12-14	959	31.9667	2023-07-31	0
2020111246	0	5.78	0	5.42578	1	0	65	0	1	0	0	0	0	2	2	0	2	1	130	0	59.1	47.5	280.7	0	2.5	0	0	0	0	0	0	13	2020-12-15	958	31.9333	2023-07-31	0
2020111818	0	5.48	0	5.86505	1	0	73	1	1	0	0	0	0	1	3	1	2	1	84	0	49.2	43.6	254.7	0	4	1	1	0	0	0	0	24	2020-12-17	956	31.8667	2023-07-31	0
2020112378	0	4.71	0	4.9169	0	1	72	1	0	0	1	1	1	1	3	1	1	1	139	0	47.25	41.3	190.7	0	3.5	0	0	0	0	1	0	13	2020-12-18	761	25.3667	2023-01-18	1
2020112903	0	5.93	0	4.75779	1	0	75	1	0	0	0	0	1	1	3	1	1	1	95	0	48.4	43.4	170	0	4.5	1	0	0	0	0	0	21	2020-12-21	418	13.9333	2022-02-12	1
2020113133	0	3.69	0	7.73128	0	1	78	1	1	0	1	1	0	2	3	1	2	1	89	0	46.05	41.2	197.1	0	3	0	0	0	0	0	0	12	2020-12-21	952	31.7333	2023-07-31	0
2020113139	0	5.59	0	6.15669	1	0	67	0	0	0	0	0	0	1	2	0	0	0	71	1	54.5	44.8	210	0	3.5	0	1	0	1	1	0	24	2020-12-21	952	31.7333	2023-07-31	0
2020113507	0	2.53	1	7.02296	0	0	71	1	1	0	0	0	0	1	1	0	0	0	50	1	56.4	43.6	205.4	0	4	1	0	0	0	0	0	17	2020-12-22	951	31.7	2023-07-31	0
2020113833	0	5.71	0	4.67462	0	1	66	0	1	1	1	1	0	1	3	1	1	1	84	0	52.2	41.2	186.8	0	4	1	0	0	0	0	0	12	2020-12-23	950	31.6667	2023-07-31	0
2020113866	0	5.9	0	8.21094	0	0	67	0	0	0	1	1	1	1	2	0	2	1	128	0	45.65	39.6	203.1	0	4	1	0	0	0	0	0	15	2020-12-25	948	31.6	2023-07-31	0
2020114502	0	6.74	0	5.55363	1	0	70	1	0	0	0	0	1	2	2	0	0	0	102	0	47.2	42.9	241.1	0	2.5	0	0	0	0	0	0	12	2020-12-25	948	31.6	2023-07-31	0
2020114750	0	8.77	0	5.28704	1	0	70	1	1	1	1	1	0	2	3	1	1	1	92	0	51.75	43.9	185.6	0	5	1	0	0	0	0	0	20	2020-12-25	948	31.6	2023-07-31	0
2020116456	0	4.83	0	5.52734	1	0	65	0	0	0	1	1	0	1	2	0	0	0	88	0	46.75	40.5	186.4	0	3	0	0	0	0	0	0	13	2020-12-31	942	31.4	2023-07-31	0
